# Supplementary material for: Quantitative Microvascular Change Analysis Using a Semi-Automated Algorithm in Macula-on Rhegmatogenous Retinal Detachment Assessed by Swept-Source Optical Coherence Tomography Angiography
Source: MDPI journal article supplement (doi:10.3390/diagnostics14070750), 2024-04-01
Supplement: s1 [file s1]

Table S1. Spearman correlation coefficients of the optical coherence tomography angiography (OCTA) parameters between eyes with rhegmatogenous retinal detachment and their fellow eyes.

|                     | <b>Superficial capillary plexus</b> |                  |                  |                  |                   |                  |
|---------------------|-------------------------------------|------------------|------------------|------------------|-------------------|------------------|
|                     | VDI RRD                             | VDI FE           | VAD RRD          | VAD FE           | VSD RRD           | VSD FE           |
| VDI RRD<br>SCC<br>p | 1                                   | 0.188<br>0.3910  | -0.287<br>0.1850 | -0.001<br>0.9964 | -0.844<br><0.0001 | -0.259<br>0.2329 |
| VDI FE<br>SCC<br>p  | 0.188<br>0.3910                     | 1                | 0.174<br>0.4274  | 0.153<br>0.4854  | -0.005<br>0.9822  | -0.711<br>0.0001 |
| VAD RRD<br>SCC<br>p | -0.287<br>0.1850                    | 0.174<br>0.4274  | 1                | 0.304<br>0.1580  | 0.678<br>0.0004   | 0.226<br>0.2992  |
| VAD FE<br>SCC<br>p  | -0.001<br>0.9964                    | 0.153<br>0.4854  | 0.304<br>0.1580  | 1                | 0.215<br>0.3236   | 0.434<br>0.0386  |
| VSD RRD<br>SCC<br>p | -0.844<br><0.0001                   | -0.005<br>0.9822 | 0.678<br>0.0004  | 0.215<br>0.3236  | 1                 | 0.302<br>0.1608  |
| VSD FE<br>SCC<br>p  | -0.259<br>0.2329                    | -0.711<br>0.0001 | 0.226<br>0.2992  | 0.434<br>0.0386  | 0.302<br>0.1608   | 1                |
|                     | <b>Deep capillary plexus</b>        |                  |                  |                  |                   |                  |
|                     | VDI RRD                             | VDI FE           | VAD RRD          | VAD FE           | VSD RRD           | VSD FE           |
| VDI RRD<br>SCC<br>p | 1                                   | 0.250<br>0.2499  | 0.503<br>0.0144  | 0.113<br>0.6088  | 0.011<br>0.9607   | 0.061<br>0.7812  |
| VDI FE<br>SCC<br>p  | 0.250<br>0.2499                     | 1                | -0.011<br>0.9607 | -0.119<br>0.5900 | -0.080<br>0.7166  | -0.303<br>0.1594 |
| VAD RRD<br>SCC<br>p | 0.503<br>0.0144                     | -0.011<br>0.9607 | 1                | 0.403<br>0.0565  | 0.846<br><0.0001  | 0.357<br>0.0948  |
| VAD FE<br>SCC<br>p  | 0.113<br>0.6088                     | -0.119<br>0.5900 | 0.403<br>0.0565  | 1                | 0.318<br>0.1390   | 0.966<br><0.0001 |
| VSD RRD<br>SCC<br>p | 0.011<br>0.9607                     | -0.080<br>0.7166 | 0.846<br><0.0001 | 0.318<br>0.1390  | 1                 | 0.266<br>0.2202  |
| VSD FE<br>SCC<br>p  | 0.910<br><0.0001                    | 0.037<br>0.8685  | 0.601<br>0.0024  | 0.150<br>0.4939  | 0.144<br>0.5113   | 0.133<br>0.5440  |

SCC: Spearman correlation coefficient; RRD: Eye with rhegmatogenous retinal detachment; FE: Fellow eye; VDI: vessel diameter index; VAD: Vessel area density; VSD: Vessel skeleton density.
